# Supplementary material
Source: Research Square preprint supplement (doi:10.21203/rs.3.rs-8936304/v1)
Supplement: Supplementary file 1 [file 4f614b89cbf62af39e59bc1b.docx]

**Survey on the Understanding of Intraoperative Endotracheal Tube Dislodgement (Otolaryngologists)**

Would you be willing to participate in this survey?

1. Yes; B. No
2. **Basic Information**
3. Age: ____ years old
4. Gender: A. Male; B. Female
5. Educational background:
6. College degree or below; B. Bachelor's degree; C. Master's degree; D. Doctoral degree
7. Years of working as an otolaryngologist: ____ years .
8. Professional title:
9. Senior title: Professor/Chief Physician; B. Associate senior title: Associate Professor/Associate Chief Physician; C. Intermediate title: Lecturer/Attending Physician; D. Junior title: Resident Physician
10. Type of medical institution:
11. General hospital; B. Specialized hospital
12. Is the medical institution a teaching hospital?
13. Yes; B. No
14. Grade of the medical institution:
15. Grade III Class A; B. Non-Grade III Class A
16. **Management of Intraoperative Endotracheal Tube Dislodgement**
17. How much do you know about intraoperative endotracheal tube dislodgement?
18. Never heard of it; B. Heard of it but not well understood; C. Have a basic understanding; D. Have a clear understanding E. Have a thorough understanding
19. How many cases of endotracheal tube dislodgement have you encountered in your work?
20. 0 case; B. 1-5 cases; C. 6-10 cases; D. > 10 cases
21. Has your department performed the following otolaryngological surgeries? (Multiple choices)
22. Laryngopharyngeal surgery with a laryngoscope; B. Pharyngeal surgery with a mouth gag; C. Transoral tonsillectomy/adenoidectomy; D. None
23. Which type of laryngopharyngeal surgery is prone to endotracheal tube dislodgement in your opinion?
24. Laryngopharyngeal surgery with a laryngoscope; B. Pharyngeal surgery with a mouth gag; C. Transoral tonsillectomy/adenoidectomy
25. Do you require the anesthesiologist to monitor the endotracheal tube throughout the placement of the laryngoscope or mouth gag?
26. Yes; B. No
27. Do you require the anesthesiologist to monitor the endotracheal tube throughout the removal of the laryngoscope or mouth gag?
28. Yes; B. No
29. What do you think is the correct method for fixing an endotracheal tube?
30. Adhesive tape fixation, facilitating intraoperative manipulation;B. Suture fixation, reducing endotracheal tube movement; C. Not sure
31. In your opinion, which group is the most susceptible to endotracheal tube dislodgement during laryngopharyngeal surgery?
32. Infants (0-3 years old); B. Preschool children (4-7 years old) ; C. School-age children and adolescents (8-13 years old); D. Adolescents (14-18 years old) ; E. Adults (≥18 years old)
33. What methods do you usually adopt to prevent endotracheal tube dislodgement during the placement or removal of the laryngoscope or mouth gag? (Multiple choices)
34. Custom oral fixator; B. Manual fixation by oneself; C. Assistant-assisted fixation; D. Others
35. Do you think endotracheal tube dislodgement is more likely to occur during placement, removal of the laryngoscope/mouth gag, or intraoperative operation?
36. Prone to occur during placement ____________________ (State specific reasons) ;
37. Prone to occur during removal ________________________ (State specific reasons)
38. Prone to occur during intraoperative operation ___________ (State specific reasons)
39. How soon can you detect endotracheal tube dislodgement if it occurs intraoperatively? Immediately Within 3 minutes Within 3-5 minutes More than 5 minutes Unable to detect 12. By what means do you detect endotracheal tube dislodgement?
40. Informed by anesthesiologist ; B. Detected by self-examination; C. Prompted by monitor; D. Others
41. What do you think is the most common cause of intraoperative endotracheal tube dislodgement?
42. Mismatch between endotracheal tube size and the patient; B. Insufficient cuff pressure of the endotracheal tube; C. Improper operation by the surgeon; D. Improper fixation method of the endotracheal tube; E. Prolonged operation time; F. Others: _________________ (State specific reasons)
43. Do you think endotracheal tube dislodgement requires emergency treatment?
44. Yes; B. No
45. What emergency measures will you take if a patient under your care experiences endotracheal tube dislodgement?
46. Reintubate directly; B. Ask the anesthesiologist to perform reintubation
47. Have you encountered patients with endotracheal tube dislodgement who developed complications such as anoxic asphyxia, need for ICU admission, or even death? (Multiple choices allowed)
48. No, resolved smoothly intraoperatively without complications; B. Complications occurred, type of complications ______, ____ cases ; C. Further treatment in ICU, ____ cases D. Death, ____ cases
49. Have you encountered medical dispute cases caused by complications or death of patients due to endotracheal tube dislodgement?
50. Yes, ____ cases, type of complications _______; B. Yes, ____ cases, death; C. No
51. **Training Needs**
52. How do you view the necessity of acquiring knowledge about intraoperative endotracheal tube dislodgement?
53. Unnecessary; B. Slightly necessary; C. Quite necessary; D. Extremely necessary
54. Would you attend training/meetings/seminars on intraoperative endotracheal tube dislodgement if available?
55. Yes (No need to answer the next question); B. No
56. What is the reason for your unwillingness to attend the relevant training/meetings/seminars?

A. Busy with work, no time to participate; B. No serious adverse events occur in such patients; C. Very few cases of intraoperative endotracheal tube dislodgement in clinical practice; D. Not interested in this field E. Management of intraoperative endotracheal tube dislodgement is the responsibility of anesthesiologists, irrelevant to otolaryngologists ; F. Others: _______________
