# Supplementary material
Source: Research Square preprint supplement (doi:10.21203/rs.3.rs-8936304/v1)
Supplement: Supplementary file 2 [file 56fbe0aaa1b8101e06287b9e.docx]

**Survey on the Understanding of Intraoperative Endotracheal Tube Dislodgement (Anesthesiologist)**

Would you be willing to participate in this survey?

1. Yes; B. No
2. **Basic Information**
3. Age: ____ years old
4. Gender: A. Male; B. Female
5. Educational background:
6. College degree or below; B. Bachelor's degree; C. Master's degree; D. Doctoral degree
7. Years of working as an otolaryngologist: ____ years .
8. Professional title:
9. Senior title: Professor/Chief Physician; B. Associate senior title: Associate Professor/Associate Chief Physician; C. Intermediate title: Lecturer/Attending Physician; D. Junior title: Resident Physician
10. Type of medical institution:
11. General hospital; B. Specialized hospital
12. Is the medical institution a teaching hospital?
13. Yes; B. No
14. Grade of the medical institution:
15. Grade III Class A; B. Non-Grade III Class A
16. **Management of Intraoperative Endotracheal Tube Dislodgement**
17. How much do you know about intraoperative endotracheal tube dislodgement?
18. Never heard of it; B. Heard of it but not well understood; C. Have a basic understanding; D. Have a clear understanding E. Have a thorough understanding
19. How many cases of endotracheal tube dislodgement have you encountered in your work?
20. 0 case; B. 1-5 cases; C. 6-10 cases; D. > 10 cases
21. The department with the highest incidence of endotracheal tube dislodgement (Single choice)
    A. Otolaryngology；B. Oral and Maxillofacial Surgery；C. Neurosurgery；D. Others ___________(Specify the department)
22. Do you inform patients and/or their family members of the risk of endotracheal tube dislodgement before performing transoral surgery?
    A. Yes； B. No
23. Do you monitor the status of the endotracheal tube throughout the process when an otolaryngologist places a laryngoscope or mouth gag?
    A. Yes； B. No
24. Do you pay close attention to the risk of endotracheal tube dislodgement when an otolaryngologist removes a laryngoscope or mouth gag?
    A. Yes； B. No
25. Which type of laryngopharyngeal surgery do you think is prone to endotracheal tube dislodgement?
    A. Laryngopharyngeal surgery with a laryngoscope；B. Pharyngeal surgery with a mouth gag；C. Transoral tonsillectomy/adenoidectomy；D. Not sure
26. In your opinion, which group is the most susceptible to endotracheal tube dislodgement during laryngopharyngeal surgery?
    A. Infants (0-3 years old)； B. Preschool children (4-6 years old)； C. School-age children and adolescents (7-13 years old)； D. Adolescents (14-18 years old) ； E. Adults (≥18 years old)
27. Do you think endotracheal tube dislodgement is more likely to occur during placement, removal of the laryngoscope/mouth gag, or intraoperative operation?
    A. Prone to occur during placement ____________________ (State specific reasons)
    B. Prone to occur during removal ______________________ (State specific reasons)
    C. Prone to occur during intraoperative operation ___________ (State specific reasons)
28. What do you think is the most common cause of intraoperative endotracheal tube dislodgement?
    A. Mismatch between endotracheal tube size and the patient； B. Insufficient cuff pressure of the endotracheal tube； C. Improper operation by the surgeon； D. Improper fixation method of the endotracheal tube；E. Prolonged operation time；F. Others: ___________ (State specific reasons)
29. By what means do you detect endotracheal tube dislodgement?
    A. Observation of hypoxic manifestations in patients； B. Prompted by monitor； C. Informed by the surgeon； D. Others ________________ (Specify the means)
30. How soon can you detect endotracheal tube dislodgement if it occurs intraoperatively?
    A. Immediately； B. Within 3 minutes； C. Within 3-5 minutes； D. More than 5 minutes
31. What method do you usually adopt to fix the endotracheal tube during laryngopharyngeal surgery?
    A. Adhesive tape fixation, facilitating intraoperative manipulation； B. Suture fixation, reducing endotracheal tube movement； C. Not sure
32. Does endotracheal tube dislodgement require emergency treatment?
    A. Yes； B. No
33. What emergency measures will you take if a patient under your care experiences endotracheal tube dislodgement?
    A. Reintubate directly； B. Reintubate after oxygen supply via face mask； C. The surgeon performs reintubation directly
34. Have you encountered patients with endotracheal tube dislodgement who developed complications such as anoxic asphyxia, need for ICU admission, or even death? (Multiple choices allowed)
    A. No, resolved smoothly intraoperatively without complications； B. Complications occurred, type of complications __ _, _ _ cases； C. Further treatment in ICU, ___ cases； D. Death, ____ cases
35. Have you encountered medical dispute cases caused by complications or death of patients due to endotracheal tube dislodgement?
36. Yes, ____ cases, type of complications _______; B. Yes, ____ cases, death; C. No
37. **Training Needs**
38. How do you view the necessity of acquiring knowledge about intraoperative endotracheal tube dislodgement?
39. Unnecessary; B. Slightly necessary; C. Quite necessary; D. Extremely necessary
40. Would you attend training/meetings/seminars on intraoperative endotracheal tube dislodgement if available?
41. Yes (No need to answer the next question); B. No
42. What is the reason for your unwillingness to attend the training/meetings/seminars?
    A. Busy with work, no time to participate； B. No serious adverse events occur in such patients； C. Very few cases of intraoperative endotracheal tube dislodgement in clinical practice； D. Not interested in this field； E. Others: _________ (State specific reasons)
